# Supplementary material for: Calorie restriction increases insulin sensitivity to promote beta cell homeostasis and longevity in mice
Source: Nat Commun. 2024 Oct 21;15:9063. doi: 10.1038/s41467-024-53127-2 (PMC11493975; doi:10.1038/s41467-024-53127-2)
Supplement: Supplementary file 11 — Supplementary Data 6 [file 41467_2024_53127_MOESM11_ESM.xlsx]

## Sheet: Venn_FOXp1
VENN FOXp1
	AL	CR	HF	..set..	..values..	..count..
1	TRUE	TRUE	TRUE	ALnCRnHF	c("Foxp1", "Maml3", "Pard3", "Pcsk2")	4
2	FALSE	TRUE	TRUE	(CRnHF)\(AL)	c("Atp8b1", "Auts2", "Deptor", "Phf21a", "Rere", "Rora")	6
3	TRUE	FALSE	TRUE	(ALnHF)\(CR)	c("Negr1", "Phactr1")	2
4	FALSE	FALSE	TRUE	(HF)\(AL<U+222A>CR)	c("Aatf", "Ap3m2", "Atp6v0a4", "Atxn1", "Cacna1c", "Camkk2", "Cdc27", "Cdon", "Eda", "Esrrg", "Fam155a", "Gnao1", "Gtf2e2", "Hipk1", "Ikzf2", "Itgb8", "Kcnmb2", "Kidins220", "Lrrn1", "Mark2", "Mpped2", "Pclo", "Pcx", "Per2", "Pfkfb2", "Phlpp2", "Rcl1", "Rims2", "Robo1", "Rps6ka3", "Sntg1", "Tacc1", "Tox", "Trim23", "Zbtb42")	35
5	TRUE	TRUE	FALSE	(ALnCR)\(HF)	c("Cacnb2", "Setbp1", "Sgcz", "Zbtb20")	4
6	FALSE	TRUE	FALSE	(CR)\(AL<U+222A>HF)	c("Akap13", "Clasp1", "Cnot6l", "Cntnap2", "Dach1", "Dcaf5", "Efcab1", "Fras1", "Ghr", "Klf12", "Kpna4", "Lamp2", "Lpp", "Mbnl2", "Nbea", "Nol4", "Nrxn1", "Pip5k1b", "Rap1gap2", "Sorbs2", "Stag1", "Taok1", "Tjp1", "Tspan5", "Ulk2", "Ush2a")	26
7	TRUE	FALSE	FALSE	(AL)\(CR<U+222A>HF)	c("Aig1", "Akt2", "Ank2", "Ank3", "Anp32a", "Atp2b4", "Bcl2l11", "Cadm1", "Cblb", "Chn1", "Clip1", "Crbn", "Ctnnbl1", "Dyrk2", "Fcho2", "Fhit", "Gnaq", "Gpd2", "Hivep2", "Iqsec1", "Irs1", "Lrig2", "Mcc", "Mettl16", "Mid1", "Mphosph9", "Myt1l", "Nipbl", "Pex5l", "Prkar2b", "Ptpn3", "Rapgef4", "Rsrc1", "Rtn3", "Scg3", "Sdk1", "Slc38a2", "Syn3", "Trps1", "Ube2h", "Zbtb40", "Zfp804b")	42

## Sheet: Venn_Mafa
VENN MAFA
	CR	HF	..set..	..values..	..count..
1	TRUE	TRUE	CRnHF	c("2510039O18Rik", "9530068E07Rik", "Actg1", "Akt2", "Aldoa", "Alkbh5", "Ankra2", "Ap2m1", "Arf1", "Arf5", "Armc5", "Atp1b1", "Atp5d", "Atp5k", "Atp6v0c", "Atp6v1b2", "B3gat3", "B4galt3", "BC005537", "BC031181", "Brd2", "Brd3", "C1galt1", "Cacybp", "Camk2n1", "Camk2n2", "Cbfa2t3", "Cbx6", "Ccdc47", "Ccdc59", "Ccnd2", "Ccni", "Cct4", "Cdadc1", "Cdc37", "Cdc5l", "Cdipt", "Cdv3", "Celsr3", "Chga", "…	229
2	FALSE	TRUE	(HF)\(CR)	c("1810055G02Rik", "2810006K23Rik", "6430548M08Rik", "AI413582", "AW011738", "AW549877", "Abca3", "Abhd12", "Acsl4", "Actr1b", "Adamts3", "Add1", "Adipor1", "Adpgk", "Aff4", "Ahi1", "Akap11", "Akap5", "Akirin1", "Akt1", "Alad", "Alcam", "Aldh18a1", "Amigo2", "Angptl2", "Ankrd49", "Anks1", "Apc", "Aplp2", "Arfip2", "Arhgap12", "Arhgef7", "Arl4a", "Armcx3", "Arpc5", "Asphd1", "Aspm", "Atad2", "Atf2…	689
3	TRUE	FALSE	(CR)\(HF)	c("Acvr1c", "Ankle2", "Aph1a", "Arfgap2", "Becn1", "Calm1", "Cdkn1a", "Clip3", "Cln6", "Cntfr", "Ctu2", "Cyb561d1", "Dctn1", "Dctn3", "Ddx6", "Dlst", "Eif3l", "Eif6", "Epn1", "Erp29", "Fam107a", "Fam192a", "Fis1", "H2afz", "Htatsf1", "Impdh1", "Ina", "Itm2b", "Leng8", "Mark4", "Mettl4", "Mthfr", "Mzt2", "Ncbp2", "Nufip1", "Ogdhl", "Prkcz", "Ptprn", "Rpl31", "Rpl36al", "Rpl9", "Rps17", "Sec23ip", …	61

## Sheet: Venn_Creb3l2
VENN CREB2L2
	AL	CR	HF	..set..	..values..	..count..
1	TRUE	TRUE	TRUE	ALnCRnHF	c("Aff4", "Arcn1", "Arfgap3", "Atg5", "Btg1", "Cadps", "Cep120", "Cltc", "Cntnap2", "Copb1", "Cpe", "Creb3l2", "Dhx40", "Dnajc10", "Dock9", "Ehbp1", "Elavl4", "Eml6", "Entpd7", "Fndc3b", "Gbf1", "Gfpt1", "H13", "Hdlbp", "Hnrnpr", "Hnrnpu", "Ica1", "Lrrc8d", "Ltn1", "Manf", "Mbnl2", "Mllt3", "Myo9b", "Nbas", "Nucb2", "Osbp", "Pak3", "Pard3", "Pbx1", "Pcsk2", "Pde4dip", "Pdia5", "Phldb2", "Picalm",…	67
2	FALSE	TRUE	TRUE	(CRnHF)\(AL)	c("Acin1", "Ankib1", "Ap2b1", "Ascc3", "Atg13", "Atp1a1", "Azin1", "BC052040", "Bclaf1", "Cacna1c", "Cadm1", "Canx", "Cblb", "Cdk14", "Cenpc1", "Cep164", "Chchd6", "Cnot1", "Cog6", "Copa", "Copb2", "Copz1", "Csnk1a1", "Dad1", "Dnajc3", "Dtnb", "Ece1", "Elk4", "Epc1", "Erc2", "Fhit", "Filip1", "Foxred2", "Grb2", "Heca", "Herpud2", "Idh1", "Jmy", "Kcnq1ot1", "Kdelr2", "Kdm5a", "Larp1b", "Luc7l2", "…	107
3	TRUE	FALSE	TRUE	(ALnHF)\(CR)	c("4932438A13Rik", "Abca5", "Adarb1", "Arid1b", "Atp2b2", "Atrnl1", "Calu", "Car10", "Clint1", "Cnnm2", "Cnot10", "Crbn", "Ctnna2", "Daam1", "Dcaf7", "Derl1", "Dhdds", "Dock4", "Edem1", "Eef1g", "Ell2", "Erlec1", "Faf1", "Fam20a", "Fam50a", "Fbxl16", "Fosb", "Glud1", "Gng12", "Golim4", "Gtf3c2", "Hcfc2", "Herc1", "Hnrnpc", "Hnrnpul1", "Ibtk", "Igf1r", "Iqgap1", "Kif5c", "Ksr2", "Lmo7", "Lnx1", "L…	110
4	FALSE	FALSE	TRUE	(HF)\(AL<U+222A>CR)	c("1600020E01Rik", "2300009A05Rik", "2310022B05Rik", "2700062C07Rik", "2900026A02Rik", "5330417C22Rik", "Aak1", "Abat", "Abca1", "Abca3", "Abcb9", "Abhd6", "Abl2", "Ablim1", "Abr", "Acbd3", "Acly", "Acsl5", "Actn1", "Adam10", "Adamts17", "Aff2", "Aga", "Agbl3", "Ahi1", "Aida", "Aip", "Akap1", "Ampd2", "Ank", "Ankhd1", "Ankrd24", "Ankrd27", "Ankrd55", "Ap4e1", "Apbb2", "Apc", "Arf4", "Arhgap17", "…	474
5	TRUE	TRUE	FALSE	(ALnCR)\(HF)	c("4833420G17Rik", "Aatk", "Ahcyl2", "Arfgef1", "Atp1b1", "Atp6v0c", "Baz2b", "Btbd7", "Btbd9", "C1galt1", "Calm1", "Ccdc85c", "Cdc27", "Cdh7", "Cfdp1", "Cmas", "Cnot2", "Crebbp", "Crkl", "Ctcf", "Dap", "Dennd5a", "Dido1", "Dnttip1", "Dym", "Esrp1", "Fam168a", "Fbxo10", "Fhdc1", "Fip1l1", "Fnip1", "Foxo3", "Gars", "Gnao1", "Hipk1", "Hnrnpa3", "Hnrnpd", "Hpcal1", "Ick", "Igf2r", "Insig2", "Kcnma1"…	85
6	FALSE	TRUE	FALSE	(CR)\(AL<U+222A>HF)	c("0610040J01Rik", "1700123O20Rik", "1810013L24Rik", "2510009E07Rik", "6430548M08Rik", "Acaca", "Acap3", "Acot13", "Acvr1", "Adcy2", "Adnp2", "Agap3", "Agtpbp1", "Ahctf1", "Akap11", "Aldoa", "Ankrd12", "Ap3m1", "Arf5", "Arfgef2", "Arfip2", "Arhgef7", "Arl5a", "Armc1", "Atg3", "Atp11b", "Atp5g2", "Atp6v0a1", "Atp6v1b2", "Atp6v1h", "Atp8b1", "Atxn7l1", "B3gat3", "BC048403", "Bcl6b", "Bcl7a", "Bex2"…	361
7	TRUE	FALSE	FALSE	(AL)\(CR<U+222A>HF)	c("4933434E20Rik", "5430416N02Rik", "Acsl4", "Actn4", "Actr3b", "Aftph", "Aig1", "Akt1s1", "Aldh9a1", "Amy1", "Anapc10", "Ankrd11", "Anxa7", "Ap1s2", "Arf1", "Arfgap1", "Arhgap12", "Arhgap44", "Arid1a", "Arih1", "Arih2", "Arntl", "Arrdc3", "Ascc2", "Asphd1", "Atp2a2", "Bap1", "Bend7", "Best3", "Cacnb1", "Cacybp", "Camk2d", "Cars2", "Cask", "Cbx4", "Ccdc47", "Ccdc91", "Ccnd2", "Cdh8", "Cdkn1b", "C…	299
