# Supplementary material for: Calorie restriction increases insulin sensitivity to promote beta cell homeostasis and longevity in mice
Source: Nat Commun. 2024 Oct 21;15:9063. doi: 10.1038/s41467-024-53127-2 (PMC11493975; doi:10.1038/s41467-024-53127-2)
Supplement: Supplementary file 12 — Supplementary Data 7 [file 41467_2024_53127_MOESM12_ESM.xlsx]

## Sheet: Mafa
CR	HF	set	genes	counts
TRUE	TRUE	CRnHF	c("2510039O18Rik", "9530068E07Rik", "Actg1", "Akt2", "Aldoa", "Alkbh5", "Ankra2", "Ap2m1", "Arf1", "Arf5", "Armc5", "Atp1b1", "Atp5d", "Atp5k", "Atp6v0c", "Atp6v1b2", "B3gat3", "B4galt3", "BC005537", "BC031181", "Brd2", "Brd3", "C1galt1", "Cacybp", "Camk2n1", "Camk2n2", "Cbfa2t3", "Cbx6", "Ccdc47", "Ccdc59", "Ccnd2", "Ccni", "Cct4", "Cdadc1", "Cdc37", "Cdc5l", "Cdipt", "Cdv3", "Celsr3", "Chga", "…	229
FALSE	TRUE	(HF)\(CR)	c("1810055G02Rik", "2810006K23Rik", "6430548M08Rik", "AI413582", "AW011738", "AW549877", "Abca3", "Abhd12", "Acsl4", "Actr1b", "Adamts3", "Add1", "Adipor1", "Adpgk", "Aff4", "Ahi1", "Akap11", "Akap5", "Akirin1", "Akt1", "Alad", "Alcam", "Aldh18a1", "Amigo2", "Angptl2", "Ankrd49", "Anks1", "Apc", "Aplp2", "Arfip2", "Arhgap12", "Arhgef7", "Arl4a", "Armcx3", "Arpc5", "Asphd1", "Aspm", "Atad2", "Atf2…	689
TRUE	FALSE	(CR)\(HF)	c("Acvr1c", "Ankle2", "Aph1a", "Arfgap2", "Becn1", "Calm1", "Cdkn1a", "Clip3", "Cln6", "Cntfr", "Ctu2", "Cyb561d1", "Dctn1", "Dctn3", "Ddx6", "Dlst", "Eif3l", "Eif6", "Epn1", "Erp29", "Fam107a", "Fam192a", "Fis1", "H2afz", "Htatsf1", "Impdh1", "Ina", "Itm2b", "Leng8", "Mark4", "Mettl4", "Mthfr", "Mzt2", "Ncbp2", "Nufip1", "Ogdhl", "Prkcz", "Ptprn", "Rpl31", "Rpl36al", "Rpl9", "Rps17", "Sec23ip", …	61

## Sheet: Creb3l2
AL	CR	HF	set	genes	count
TRUE	TRUE	TRUE	ALnCRnHF	c("Aff4", "Arcn1", "Arfgap3", "Atg5", "Btg1", "Cadps", "Cep120", "Cltc", "Cntnap2", "Copb1", "Cpe", "Creb3l2", "Dhx40", "Dnajc10", "Dock9", "Ehbp1", "Elavl4", "Eml6", "Entpd7", "Fndc3b", "Gbf1", "Gfpt1", "H13", "Hdlbp", "Hnrnpr", "Hnrnpu", "Ica1", "Lrrc8d", "Ltn1", "Manf", "Mbnl2", "Mllt3", "Myo9b", "Nbas", "Nucb2", "Osbp", "Pak3", "Pard3", "Pbx1", "Pcsk2", "Pde4dip", "Pdia5", "Phldb2", "Picalm",…	67
FALSE	TRUE	TRUE	(CRnHF)\(AL)	c("Acin1", "Ankib1", "Ap2b1", "Ascc3", "Atg13", "Atp1a1", "Azin1", "BC052040", "Bclaf1", "Cacna1c", "Cadm1", "Canx", "Cblb", "Cdk14", "Cenpc1", "Cep164", "Chchd6", "Cnot1", "Cog6", "Copa", "Copb2", "Copz1", "Csnk1a1", "Dad1", "Dnajc3", "Dtnb", "Ece1", "Elk4", "Epc1", "Erc2", "Fhit", "Filip1", "Foxred2", "Grb2", "Heca", "Herpud2", "Idh1", "Jmy", "Kcnq1ot1", "Kdelr2", "Kdm5a", "Larp1b", "Luc7l2", "…	107
TRUE	FALSE	TRUE	(ALnHF)\(CR)	c("4932438A13Rik", "Abca5", "Adarb1", "Arid1b", "Atp2b2", "Atrnl1", "Calu", "Car10", "Clint1", "Cnnm2", "Cnot10", "Crbn", "Ctnna2", "Daam1", "Dcaf7", "Derl1", "Dhdds", "Dock4", "Edem1", "Eef1g", "Ell2", "Erlec1", "Faf1", "Fam20a", "Fam50a", "Fbxl16", "Fosb", "Glud1", "Gng12", "Golim4", "Gtf3c2", "Hcfc2", "Herc1", "Hnrnpc", "Hnrnpul1", "Ibtk", "Igf1r", "Iqgap1", "Kif5c", "Ksr2", "Lmo7", "Lnx1", "L…	110
FALSE	FALSE	TRUE	(HF)\(AL<U+222A>CR)	c("1600020E01Rik", "2300009A05Rik", "2310022B05Rik", "2700062C07Rik", "2900026A02Rik", "5330417C22Rik", "Aak1", "Abat", "Abca1", "Abca3", "Abcb9", "Abhd6", "Abl2", "Ablim1", "Abr", "Acbd3", "Acly", "Acsl5", "Actn1", "Adam10", "Adamts17", "Aff2", "Aga", "Agbl3", "Ahi1", "Aida", "Aip", "Akap1", "Ampd2", "Ank", "Ankhd1", "Ankrd24", "Ankrd27", "Ankrd55", "Ap4e1", "Apbb2", "Apc", "Arf4", "Arhgap17", "…	474
TRUE	TRUE	FALSE	(ALnCR)\(HF)	c("4833420G17Rik", "Aatk", "Ahcyl2", "Arfgef1", "Atp1b1", "Atp6v0c", "Baz2b", "Btbd7", "Btbd9", "C1galt1", "Calm1", "Ccdc85c", "Cdc27", "Cdh7", "Cfdp1", "Cmas", "Cnot2", "Crebbp", "Crkl", "Ctcf", "Dap", "Dennd5a", "Dido1", "Dnttip1", "Dym", "Esrp1", "Fam168a", "Fbxo10", "Fhdc1", "Fip1l1", "Fnip1", "Foxo3", "Gars", "Gnao1", "Hipk1", "Hnrnpa3", "Hnrnpd", "Hpcal1", "Ick", "Igf2r", "Insig2", "Kcnma1"…	85
FALSE	TRUE	FALSE	(CR)\(AL<U+222A>HF)	c("0610040J01Rik", "1700123O20Rik", "1810013L24Rik", "2510009E07Rik", "6430548M08Rik", "Acaca", "Acap3", "Acot13", "Acvr1", "Adcy2", "Adnp2", "Agap3", "Agtpbp1", "Ahctf1", "Akap11", "Aldoa", "Ankrd12", "Ap3m1", "Arf5", "Arfgef2", "Arfip2", "Arhgef7", "Arl5a", "Armc1", "Atg3", "Atp11b", "Atp5g2", "Atp6v0a1", "Atp6v1b2", "Atp6v1h", "Atp8b1", "Atxn7l1", "B3gat3", "BC048403", "Bcl6b", "Bcl7a", "Bex2"…	361
TRUE	FALSE	FALSE	(AL)\(CR<U+222A>HF)	c("4933434E20Rik", "5430416N02Rik", "Acsl4", "Actn4", "Actr3b", "Aftph", "Aig1", "Akt1s1", "Aldh9a1", "Amy1", "Anapc10", "Ankrd11", "Anxa7", "Ap1s2", "Arf1", "Arfgap1", "Arhgap12", "Arhgap44", "Arid1a", "Arih1", "Arih2", "Arntl", "Arrdc3", "Ascc2", "Asphd1", "Atp2a2", "Bap1", "Bend7", "Best3", "Cacnb1", "Cacybp", "Camk2d", "Cars2", "Cask", "Cbx4", "Ccdc47", "Ccdc91", "Ccnd2", "Cdh8", "Cdkn1b", "C…	299

## Sheet: Foxp1
AL	CR	HF	set	genes	count
TRUE	TRUE	TRUE	ALnCRnHF	c("Foxp1", "Maml3", "Pard3", "Pcsk2")	4
FALSE	TRUE	TRUE	(CRnHF)\(AL)	c("Atp8b1", "Auts2", "Deptor", "Phf21a", "Rere", "Rora")	6
TRUE	FALSE	TRUE	(ALnHF)\(CR)	c("Negr1", "Phactr1")	2
FALSE	FALSE	TRUE	(HF)\(AL<U+222A>CR)	c("Aatf", "Ap3m2", "Atp6v0a4", "Atxn1", "Cacna1c", "Camkk2", "Cdc27", "Cdon", "Eda", "Esrrg", "Fam155a", "Gnao1", "Gtf2e2", "Hipk1", "Ikzf2", "Itgb8", "Kcnmb2", "Kidins220", "Lrrn1", "Mark2", "Mpped2", "Pclo", "Pcx", "Per2", "Pfkfb2", "Phlpp2", "Rcl1", "Rims2", "Robo1", "Rps6ka3", "Sntg1", "Tacc1", "Tox", "Trim23", "Zbtb42")	35
TRUE	TRUE	FALSE	(ALnCR)\(HF)	c("Cacnb2", "Setbp1", "Sgcz", "Zbtb20")	4
FALSE	TRUE	FALSE	(CR)\(AL<U+222A>HF)	c("Akap13", "Clasp1", "Cnot6l", "Cntnap2", "Dach1", "Dcaf5", "Efcab1", "Fras1", "Ghr", "Klf12", "Kpna4", "Lamp2", "Lpp", "Mbnl2", "Nbea", "Nol4", "Nrxn1", "Pip5k1b", "Rap1gap2", "Sorbs2", "Stag1", "Taok1", "Tjp1", "Tspan5", "Ulk2", "Ush2a")	26
TRUE	FALSE	FALSE	(AL)\(CR<U+222A>HF)	c("Aig1", "Akt2", "Ank2", "Ank3", "Anp32a", "Atp2b4", "Bcl2l11", "Cadm1", "Cblb", "Chn1", "Clip1", "Crbn", "Ctnnbl1", "Dyrk2", "Fcho2", "Fhit", "Gnaq", "Gpd2", "Hivep2", "Iqsec1", "Irs1", "Lrig2", "Mcc", "Mettl16", "Mid1", "Mphosph9", "Myt1l", "Nipbl", "Pex5l", "Prkar2b", "Ptpn3", "Rapgef4", "Rsrc1", "Rtn3", "Scg3", "Sdk1", "Slc38a2", "Syn3", "Trps1", "Ube2h", "Zbtb40", "Zfp804b")	42
